# Supplementary material
Source: PubMed Central journal article supplement (PMC3567733)
Supplement: 47b987bd9c87a34eca29219c3d680276_genetics.112.145748-4.pdf [file 47b987bd9c87a34eca29219c3d680276_genetics.112.145748-4.pdf]

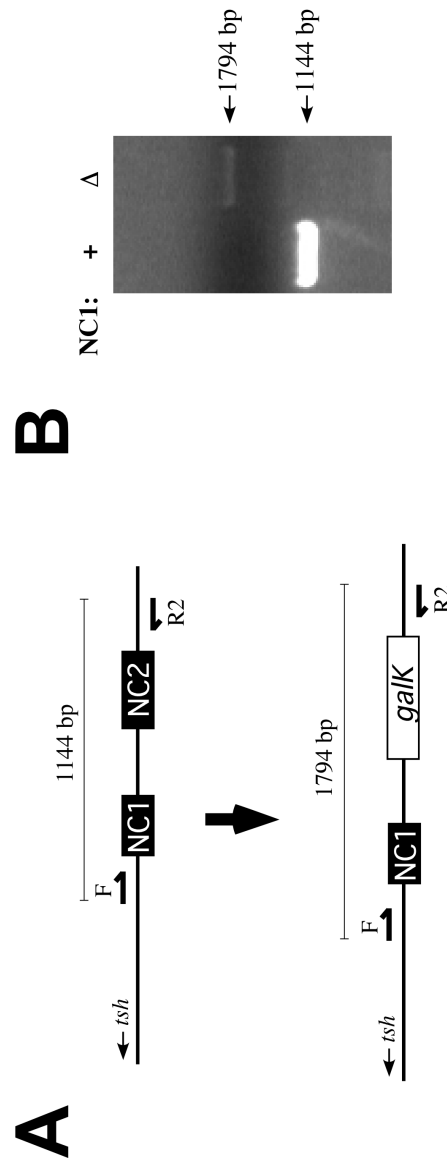

**Figure S2** Confirmation of *tshNC2* deletion following captured segment exchange. A, schematic showing relative positions of primers NC1check1for (F) and NC2check1rev (R2). Diagrams are not to scale. B, Ethidium-stained gel showing PCR products from templates where *tshNC2* is unaltered (+) or deleted ( $\Delta$ ) and replaced with *galk* using purified BAC DNA or *Drosophila* genomic DNA as templates. Candidate flies homozygous for the recombinant chromosome carrying the deletion (right-most lane) show the predicted PCR product.
