# Supplementary material
Source: PubMed Central journal article supplement (PMC3567733)
Supplement: 66c57810ced69f71dce47322879ed29c_genetics.112.145748-5.pdf [file 66c57810ced69f71dce47322879ed29c_genetics.112.145748-5.pdf]

**Table S2** Integration efficiency of GMR-P[acman] constructs.

| Insert Name        | Insert Size<br>(kb) | Total Vials Scored | Vials With<br>Integrants | Efficiency of<br>Integration |
|--------------------|---------------------|--------------------|--------------------------|------------------------------|
| tsh1               | 1                   | 45                 | 4                        | 8.8%                         |
| tsh50              | 50                  | 90                 | 5*                       | 5.5%*                        |
| tsh50 $\Delta$ NC1 | 50                  | 120                | 5*                       | 4.2%*                        |
| tsh50 $\Delta$ NC2 | 50                  | 65                 | 5*                       | 7.7%*                        |

All constructs were injected by BestGene Inc. using *PBac(y<sup>+</sup>-attP-3B)VK00003b* as a target site and *M[vas-int.Dm]ZH2A* as a source of the integrase. Integrants were identified based on *mini-white* eye pigmentation. Efficiency of integration is calculated as the number of vials with integrants divided by the total vials scored, expressed as a percentage.

\*In cases where 5 positive vials were identified, no further screening was carried out. Thus, the efficiency in these cases represents a lower limit on the true value.
