# Supplementary material
Source: PubMed Central journal article supplement (PMC3567733)
Supplement: a0df9cb3ae466c4f0fd078ebea4edee5_genetics.112.145748-2.pdf [file a0df9cb3ae466c4f0fd078ebea4edee5_genetics.112.145748-2.pdf]

**Table S1 Primers used in this study.**

| Primer name         | Sequence (5'-3')                                                              | Additional information                                                                         |
|---------------------|-------------------------------------------------------------------------------|------------------------------------------------------------------------------------------------|
| VK3b_5_3            | GGCGCGCGTACGCGCCCGGGAGCCCAAGGGCACGCCC<br>TGGCACCCGTAAACGAGACAATTTATAAATGC     | Forward primer for LA: includes<br>Ascl (orange) and 40 bp attB<br>(blue)                      |
| VK3b_3_1            | GGATCCTCTGTTTGCTATGGGCTGAA                                                    | Reverse primer for LA: includes<br>BamHI (orange)                                              |
| f06252_5_2          | TTCAGCCCATAGCAAACAGAGGATCAGAGGCTATACAAG<br>TTAGAAAGTTGA                       | Forward primer for RA: includes<br>complementary sequence to<br>VK3B_3_1 for SOEing (orange)   |
| f06252_3_1          | TTAATTAATGAAGTTCCTATACTTTCTAGAGAATAGGAACT<br>TCGCATTAATAGTCGCAATTATATTTCA     | Reverse primer for RA: includes<br>PacI (orange) and 35 bp FRT<br>(blue)                       |
| PacmanMCS-F         | TTTAAACCTCGAGCGGTCCGTTATC                                                     |                                                                                                |
| tsh-5-vk3b-check-R  | GGTTCAGCGGGACTAAGTGA                                                          |                                                                                                |
| tsh-3-06252-check-F | TGAACACACCCATAGGACGA                                                          |                                                                                                |
| PacmanMCS-R         | CTAAAGGGAACAAAAGCTGGGTAC                                                      |                                                                                                |
| tshNC1_GalK_F       | GCATCTTCTGCTTCTTCTCATCTTCTTTTGGCTTCTTGAT<br>GGACAGAACCTGTTGACCAATTAATCATCGGCA | Forward primer for tshNC1<br>deletion: includes 50 bp<br>homology adjacent to tshNC1<br>(blue) |
| tshNC1_GalK_R       | CCACCCTTTCCAACCAACATCCCCTTCACTCAGTGTGAA<br>GAAGAATCCTCAGCACTGTCTGCTCCTT       | Reverse primer for tshNC1<br>deletion: includes 50 bp<br>homology adjacent to tshNC1<br>(blue) |
| tshNC2_GalK_F       | TATGTACACACTCCGGTACCAGTATTTTGCCTGCCTTGAC<br>GTAATGCCGCCTGTTGACAATTAATCATCGGCA | Forward primer for tshNC2<br>deletion: includes 50 bp<br>homology adjacent to tshNC2<br>(blue) |
| tshNC1_GalK_R       | CCACCCTTTCCAACCAACATCCCCTTCACTCAGTGTGAA<br>GAAGAATCCTCAGCACTGTCTGCTCCTT       | Reverse primer for tshNC2<br>deletion: includes 50 bp<br>homology adjacent to tshNC2<br>(blue) |
| NC1check1for        | TGCATCGGAGACAGAGGGAGCA                                                        |                                                                                                |
| NC1check1rev        | ACCACACCCATGCCCTATGCC                                                         |                                                                                                |
| NC2check1rev        | TGGCCGAAAGGAGGCAGCAAC                                                         |                                                                                                |
| tsh_RRF3            | TTGGCACGCCAACTCAACGC                                                          |                                                                                                |
| tsh_RRR3            | TGGCAATGGTGCGGCCATCT                                                          |                                                                                                |

|         |                          |
|---------|--------------------------|
| tsh_RLF | TCTTCGTTGCGTGCGGTGGG     |
| tsh_RLR | TGCTGCAGTAGAGAGACACGGGG  |
| SNP2F   | TGCGCAGCAGTGCTCTTGAAA    |
| SNP2R   | AAAAGCCGCAAACAGCAGGCA    |
| SNP5F   | AGCAAGCGCGGCGTGAAAAT     |
| SNP5R   | AGGATTTGGTGCGGCTTGGTGA   |
| SOE_eF  | TCGCGGTGCGAGCTGTGATT     |
| SOE_eR  | TCGCACGTTCTGCTCGCTT      |
| PacBK_5 | GATCGGCGGCGCCGGGTACCGGGC |
| PacBK_3 | GATCGCCCGGTACCCGGCGCCGCC |

---
