# Supplementary material
Source: PubMed Central journal article supplement (PMC3567733)
Supplement: e7d6f0dd3c0b72f578da490c60b16f28_genetics.112.145748-1.pdf [file e7d6f0dd3c0b72f578da490c60b16f28_genetics.112.145748-1.pdf]

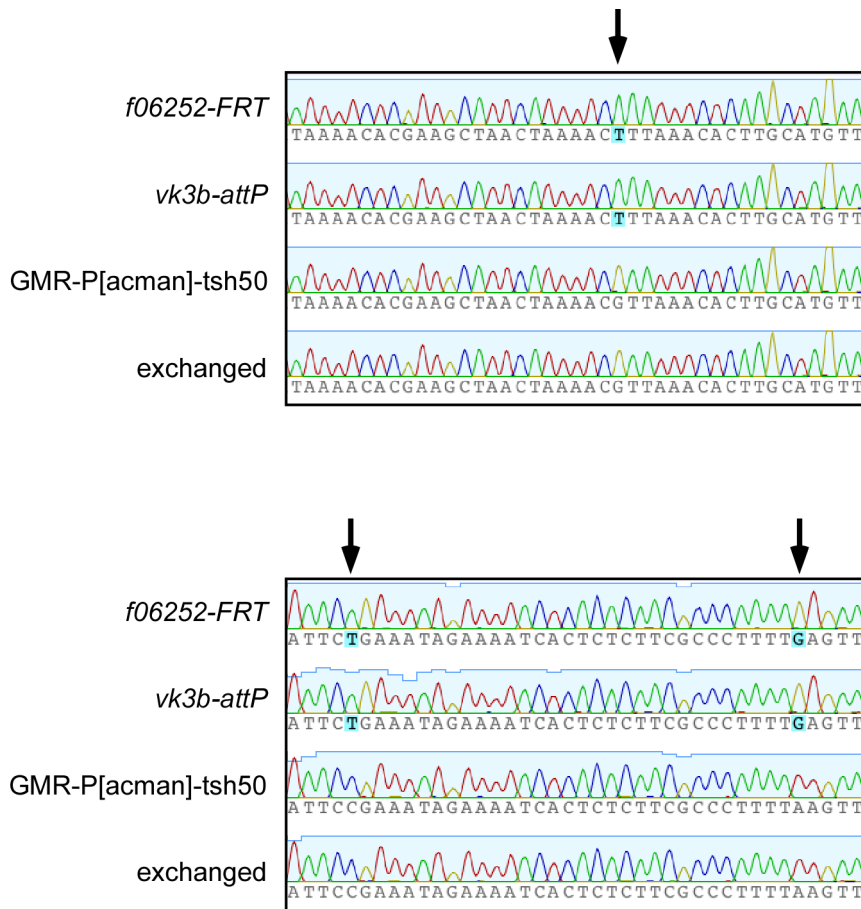

**Figure S1** SNP analysis of candidate exchange flies. Shown are traces identifying three SNPs in the 706 bp genomic region amplified by the primer pair SNP2F/SNP2R within the captured segment. For each box, the templates for amplification were: Row 1, *f06252-FRT* genomic DNA (parent chromosome); Row 2, *vk3b-attP* genomic DNA (parent chromosome); Row 3, purified BAC GMR-P[acman]-tsh50 (donor plasmid); Row 4, genomic DNA from candidate  $\gamma^w$  flies following exchange. For each SNP, only the BAC allele is observed in genomic DNA of candidate flies. We identified a total of 5 SNPs in this region that differentiate BAC DNA from both parent chromosomes, and in all cases, the allele observed in the BAC was the only allele observed in the amplified region from the genome of candidate flies. In addition, a total of 3 SNPs from a second independently amplified 797 bp region defined by primers SNP5F/SNP5R gave identical results.

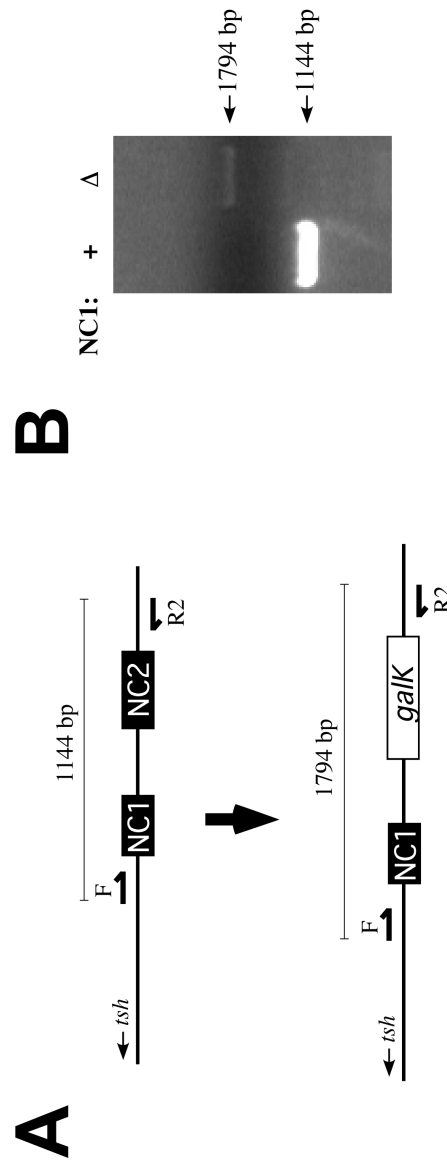

**Figure S2** Confirmation of *tshNC2* deletion following captured segment exchange. A, schematic showing relative positions of primers NC1check1for (F) and NC2check1rev (R2). Diagrams are not to scale. B, Ethidium-stained gel showing PCR products from templates where *tshNC2* is unaltered (+) or deleted ( $\Delta$ ) and replaced with *galk* using purified BAC DNA or *Drosophila* genomic DNA as templates. Candidate flies homozygous for the recombinant chromosome carrying the deletion (right-most lane) show the predicted PCR product.

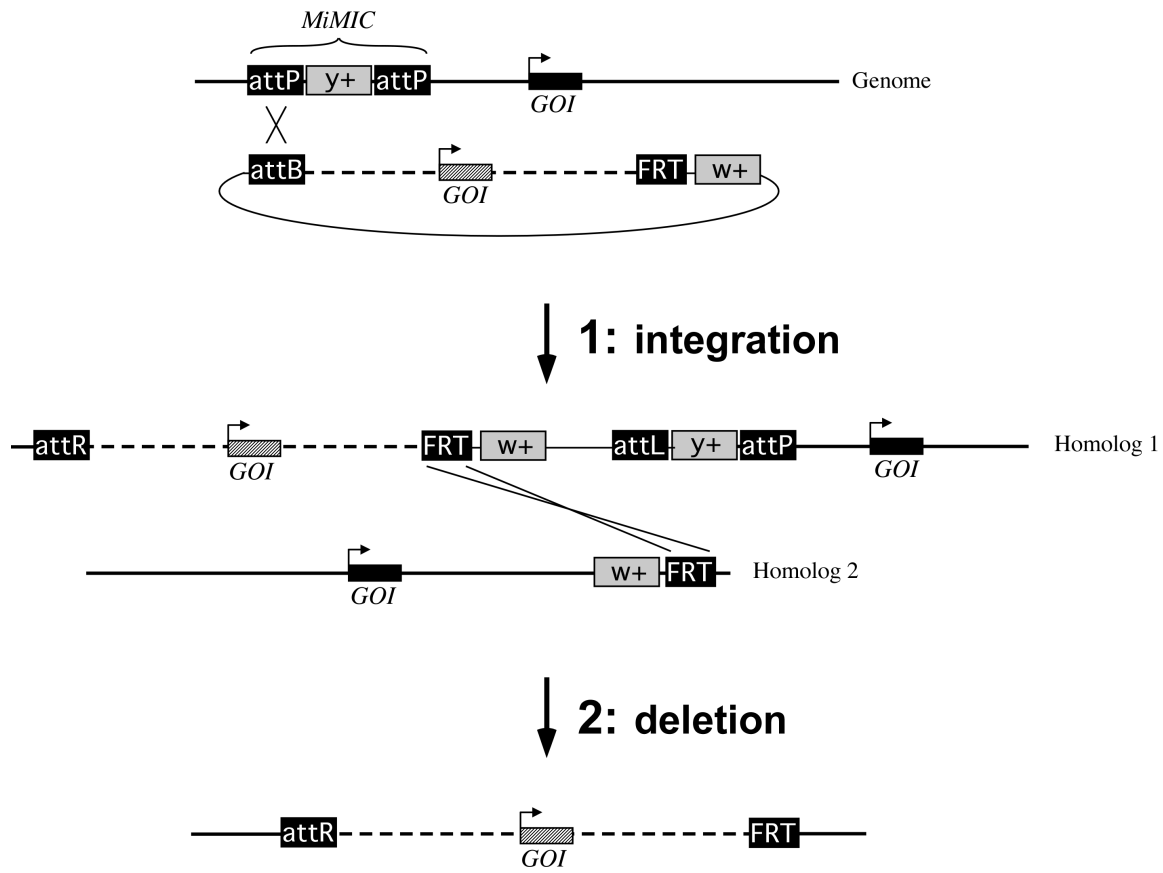

**Figure S3** Schematic for two-step dual RMCE using a MiMIC element. MiMIC differs from the *VK3b-attP* element used in the present study in that it carries two *attP* sites in opposite orientations flanking a *yellow* marker gene. Captured segment exchange can be performed following the same steps as those demonstrated in the main text; in the initial step of inserting the donor BAC, half of all insertions will be in the correct orientation to proceed as outlined in the figure, while, by chance, half of the insertions will use the *attP* in the opposite orientation (not shown).

**Table S1 Primers used in this study.**

| Primer name         | Sequence (5'-3')                                                               | Additional information                                                                         |
|---------------------|--------------------------------------------------------------------------------|------------------------------------------------------------------------------------------------|
| VK3b_5_3            | GGCGCGCGTACGCGCCCGGGAGCCCAAGGGCACGCCC<br>TGGCACCCGTAAACGAGACAATTTATAAATGC      | Forward primer for LA: includes<br>Ascl (orange) and 40 bp attB<br>(blue)                      |
| VK3b_3_1            | GGATCCTCTGTTTGCTATGGGCTGAA                                                     | Reverse primer for LA: includes<br>BamHI (orange)                                              |
| f06252_5_2          | TTCAGCCCATAGCAAACAGAGGATCAGAGGCTATACAAG<br>TTAGAAAGTTGA                        | Forward primer for RA: includes<br>complementary sequence to<br>VK3B_3_1 for SOEing (orange)   |
| f06252_3_1          | TTAATTAAATGAAGTTCCTATCTTTCTAGAGAATAGGAACT<br>TCGCATTAAATAGTCGCAATTATATTCA      | Reverse primer for RA: includes<br>PacI (orange) and 35 bp FRT<br>(blue)                       |
| PacmanMCS-F         | TTTAAACCTCGAGCGGTCCGTTATC                                                      |                                                                                                |
| tsh-5-vk3b-check-R  | GGTTCAGCGGGACTAAGTGA                                                           |                                                                                                |
| tsh-3-06252-check-F | TGAACACACCCATAGGACGA                                                           |                                                                                                |
| PacmanMCS-R         | CTAAAGGGAACAAAAGCTGGGTAC                                                       |                                                                                                |
| tshNC1_GalK_F       | GCATCTTCTGCTTCTTCTTCATCTTCTTTTGCTCTTCTTGAT<br>GGACAGAACTGTTGACCAATTAATCATCGGCA | Forward primer for tshNC1<br>deletion: includes 50 bp<br>homology adjacent to tshNC1<br>(blue) |
| tshNC1_GalK_R       | CCACCCTCTTCCAACCAACATCCCCTTCACTCAGTGTGAA<br>GAAGAATCCTCAGCACTGTCTGCTCCTT       | Reverse primer for tshNC1<br>deletion: includes 50 bp<br>homology adjacent to tshNC1<br>(blue) |
| tshNC2_GalK_F       | TATGTACACACTCCGGTACCAGTATTTTGCCTGCCTTGAC<br>GTAAATGCCGCCTGTTGACAATTAATCATCGGCA | Forward primer for tshNC2<br>deletion: includes 50 bp<br>homology adjacent to tshNC2<br>(blue) |
| tshNC1_GalK_R       | CCACCCTCTTCCAACCAACATCCCCTTCACTCAGTGTGAA<br>GAAGAATCCTCAGCACTGTCTGCTCCTT       | Reverse primer for tshNC2<br>deletion: includes 50 bp<br>homology adjacent to tshNC2<br>(blue) |
| NC1check1for        | TGCATCGGAGACAGAGGGAGCA                                                         |                                                                                                |
| NC1check1rev        | ACCACACCCATGCCCTATGCC                                                          |                                                                                                |
| NC2check1rev        | TGGCCGAAAGGAGGCAGCAAC                                                          |                                                                                                |
| tsh_RRF3            | TTGGCACGCCAACTCAACGC                                                           |                                                                                                |
| tsh_RRR3            | TGGCAATGGTGCGGCCATCT                                                           |                                                                                                |

|         |                           |
|---------|---------------------------|
| tsh_RLF | TCTTCGTTGCGTGCGGTGGG      |
| tsh_RLR | TGCTGCAGTAGAGAGACACGGGG   |
| SNP2F   | TGCGCAGCAGTGCCTCTTGAAA    |
| SNP2R   | AAAAGCCGCAAACAGCAGGCA     |
| SNP5F   | AGCAAGCGCGGCGTGAAAAT      |
| SNP5R   | AGGATTTGGTGCGGCTTGGTGA    |
| SOE_eF  | TCGCGGTGCGAGCTGTGATT      |
| SOE_eR  | TCGCACGTTCTGCTCGCTT       |
| PacBK_5 | GATCGGCGGGCGCCGGGTACCGGGC |
| PacBK_3 | GATCGCCCGGTACCCGGCGCCGCC  |

---

**Table S2** Integration efficiency of GMR-P[acman] constructs.

| Insert Name | Insert Size<br>(kb) | Total Vials Scored | Vials With<br>Integrants | Efficiency of<br>Integration |
|-------------|---------------------|--------------------|--------------------------|------------------------------|
| tsh1        | 1                   | 45                 | 4                        | 8.8%                         |
| tsh50       | 50                  | 90                 | 5*                       | 5.5%*                        |
| tsh50ΔNC1   | 50                  | 120                | 5*                       | 4.2%*                        |
| tsh50ΔNC2   | 50                  | 65                 | 5*                       | 7.7%                         |

All constructs were injected by BestGene Inc. using *PBac(y<sup>+</sup>-attP-3B)VK00003b* as a target site and *M[vas-int.Dm]ZH2A* as a source of the integrase. Integrants were identified based on *mini-white* eye pigmentation. Efficiency of integration is calculated as the number of vials with integrants divided by the total vials scored, expressed as a percentage.

\*In cases where 5 positive vials were identified, no further screening was carried out. Thus, the efficiency in these cases represents a lower limit on the true value.
